# Supplementary material for: Comparing external fixators and intramedullary nailing for treating open tibia fractures: a meta-analysis of randomized controlled trials
Source: PubMed Central journal article supplement (PMC9817243; doi:10.1186/s13018-022-03490-x), 2023-01-05

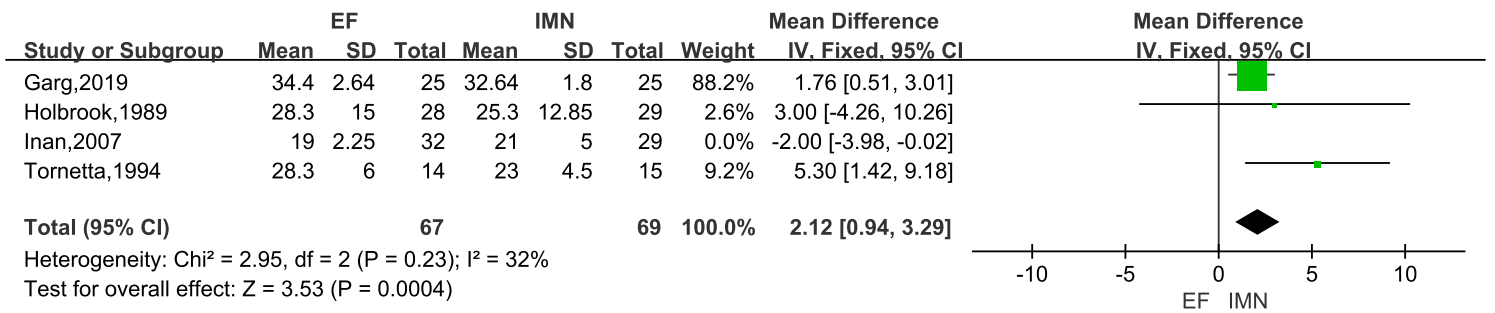

Supplement: 13018_2022_3490_MOESM2_ESM.pdf [file 13018_2022_3490_MOESM2_ESM.pdf]
